# Supplementary material
Source: PubMed Central journal article supplement (PMC4018911)
Supplement: AEM.00335-14_zam999105355so1.pdf [file AEM.00335-14_zam999105355so1.pdf]

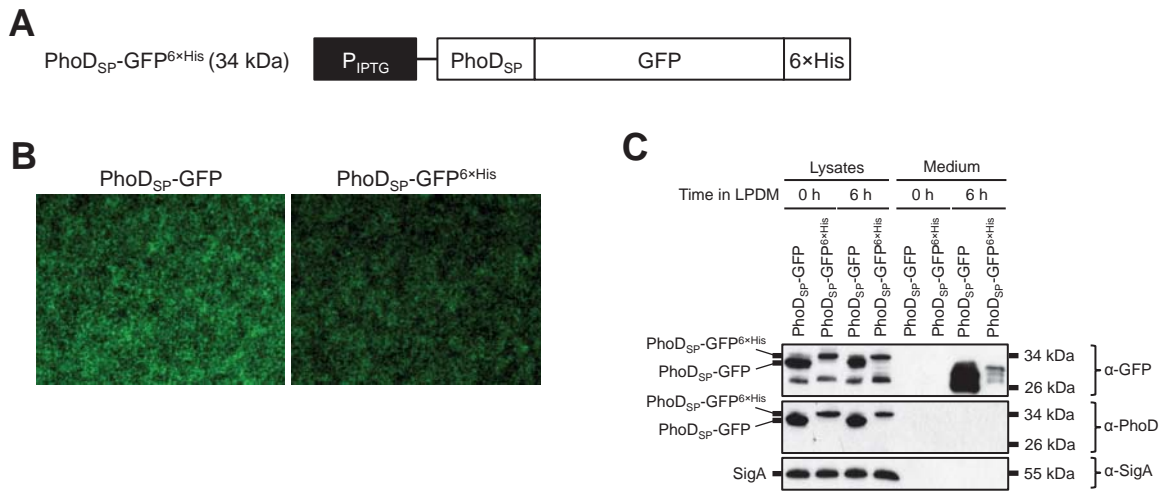

**FIG S1** PhoD-GFP<sup>6×His</sup> expression and secretion from *B. subtilis*. (A) PhoD<sub>SP</sub>-GFP<sup>6×His</sup> construct design. The predicted molecular weight is indicated in parenthesis. (B) Intracellular expression of folded GFP<sup>6×His</sup>. The indicated strains were grown overnight in HPDM supplemented with 1 mM IPTG. The next day, the cells were examined for folded GFP expression by fluorescence microscopy. (C) Secretion of total GFP<sup>6×His</sup>. The indicated strains were grown overnight in HPDM supplemented with 1 mM IPTG. The next day, the cells were washed and resuspended in LPDM supplemented with 1 mM IPTG. After 6 h in LPDM, the cells were lysed and the medium was precipitated with TCA. The cell lysates and precipitated medium were examined by Western blot analysis probing with α-GFP, α-PhoD, and α-SigA antibodies. Migration of PhoD<sub>SP</sub>-GFP, PhoD<sub>SP</sub>-GFP<sup>6×His</sup>, and SigA bands is indicated to the left of each blot. Migration of molecular weight standards is indicated to the right of each blot.

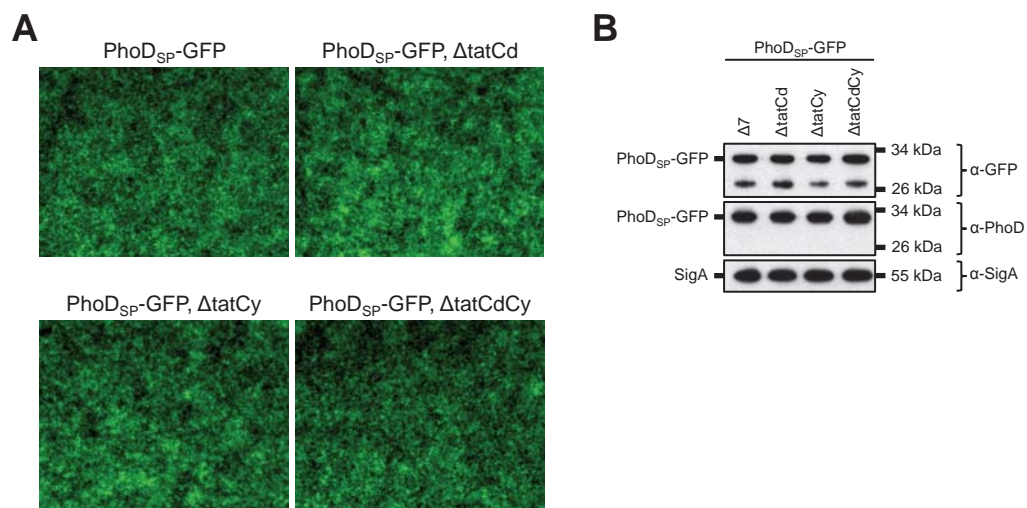

**FIG S2** Characterization of intracellular PhoD<sub>SP</sub>-GFP expression in *B. subtilis* single and double Tat-deletion strains. The indicated strains were grown overnight in HPDM supplemented with 1 mM IPTG. The next day, the cells were either (A) examined for folded GFP expression by fluorescence microscopy or (B) lysed and examined for total GFP expression by Western blot analysis probing with α-GFP, α-PhoD, and α-SigA antibodies. In panel B, migration of PhoD<sub>SP</sub>-GFP and SigA bands is indicated to the left of each blot. Migration of molecular weight standards is indicated to the right of each blot.

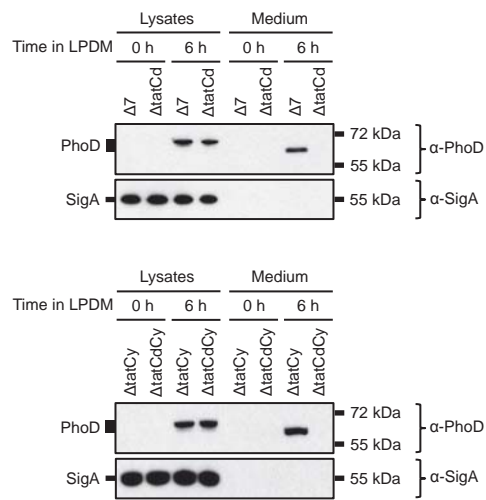

**FIG S3** Secretion of endogenous alkaline phosphatase D (PhoD) from *B. subtilis* single and double Tat-deletion strains. The indicated strains were grown overnight in HPDM. The next day, the cells were washed and resuspended in LPDM. After 6 h in LPDM, the cells were lysed and the medium was precipitated with TCA. The cell lysates and precipitated medium were examined by Western blot analysis probing with  $\alpha$ -PhoD and  $\alpha$ -SigA antibodies. Migration of PhoD and SigA bands is indicated to the left of each blot. Migration of molecular weight standards is indicated to the right of each blot.

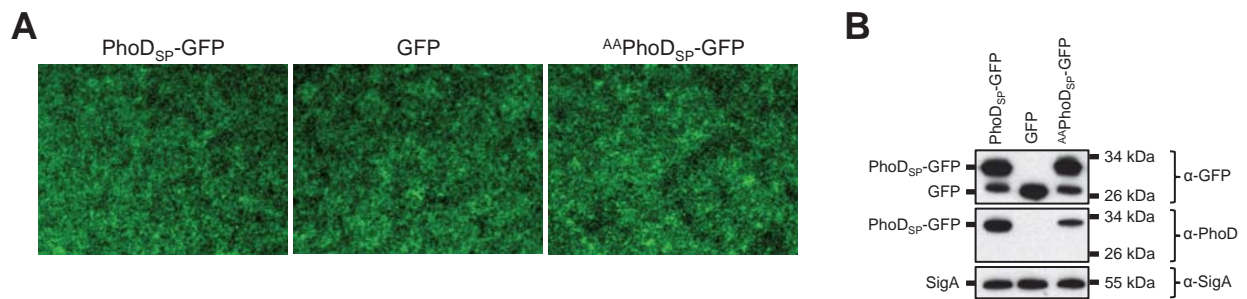

**FIG S4** Characterization of intracellular <sup>AA</sup>PhoD<sub>SP</sub>-GFP expression in *B. subtilis*. The indicated strains were grown overnight in HPDM supplemented with 1 mM IPTG. The next day, the cells were either (A) examined for folded GFP expression by fluorescence microscopy or (B) lysed and examined for total GFP expression by Western blot analysis probing with α-GFP, α-PhoD, and α-SigA antibodies. In panel B, migration of PhoD<sub>SP</sub>-GFP, GFP, and SigA bands is indicated to the left of each blot. Migration of molecular weight standards is indicated to the right of each blot.

**TABLE S1** Plasmids used in this study

| Plasmid   | Genotype                                                                        |                            |
|-----------|---------------------------------------------------------------------------------|----------------------------|
| pDP311    | $\Omega bpr$ <i>mls</i>                                                         |                            |
| pDP312    | $\Omega vpr$ <i>mls</i>                                                         |                            |
| pDP313    | $\Omega nprE$ <i>mls</i>                                                        |                            |
| pDP314    | $\Omega aprE$ <i>mls</i>                                                        |                            |
| pDP315    | $\Omega epr$ <i>mls</i>                                                         |                            |
| pDP319    | $\Omega wprA$ <i>mls</i>                                                        |                            |
| pDP320    | $\Omega mpr$ <i>mls</i>                                                         |                            |
| pDR111    | <i>amyE::P<sub>hyspank</sub> spec amp</i>                                       | (Kearns and Losick 2005)   |
| pMiniMAD2 | <i>ori<sup>BsTs</sup> amp mls</i>                                               | (Patrick and Kearns, 2008) |
| pTM1      | <i>amyE::P<sub>hvsbank</sub>-PhoD<sub>SP</sub> spec amp</i>                     |                            |
| pTM2      | <i>amyE::P<sub>hyspank</sub>-PhoD<sub>SP</sub>-GFP spec amp</i>                 |                            |
| pTM7      | <i>amyE::P<sub>hvsbank</sub>-GFP spec amp</i>                                   |                            |
| pTM8      | <i>amyE::P<sub>hyspank</sub><sup>AA</sup>-PhoD<sub>SP</sub>-GFP spec amp</i>    |                            |
| pTM9      | <i>amyE::P<sub>hyspank</sub>-PhoD<sub>SP</sub>-GFP<sup>6xHis</sup> spec amp</i> |                            |
| pTM14     | <i>amyE::P<sub>hvsbank</sub>-AmyE<sub>SP</sub>-GFP spec amp</i>                 |                            |

<sup>1</sup>Kearns, DB, Losick, R. (2005) Cell population heterogeneity during growth of *Bacillus subtilis*. *Genes Dev.* **19**(24):3083-94.

<sup>2</sup>Patrick, JE and Kearns, DB. (2008) MinJ (YvjD) is a topological determinant of cell division in *Bacillus subtilis*. *Mol Microbiol.* **70**(5):1166-79.

**TABLE S2** Primers used in this study

| Primer | Sequence                                                      |
|--------|---------------------------------------------------------------|
| 1739   | aggaggaattcgtggatacactgatcgtgat                               |
| 1740   | ctcctgctgactctgttttcgtttttcctca                               |
| 1741   | aggaggtcgacaatggaaaacttaatatgaacacagaaaaat                    |
| 1742   | ctcctggatccggttaacgcataataaaaaattga                           |
| 1743   | caaagcgaattcgtgttggga                                         |
| 1744   | ctcctgctgacgttttgaccgaagaaccttc                               |
| 1745   | aggaggtcgacaagcagaaagcgaatgatccc                              |
| 1746   | ctcctggatcctctctccgccaattgctt                                 |
| 1747   | aggaggaattcacagaacacgaatgcaatcg                               |
| 1748   | ctcctgctgacagcaacagacaatttctacct                              |
| 1749   | aggaggtcgacgttgaagcagcctggaatgc                               |
| 1750   | ctcctggatccatgatcaacctcgaaaacctg                              |
| 1751   | cctatgaattctccattttctt                                        |
| 1752   | ctcctgctgaccaagctgatccacaatttttg                              |
| 1753   | aggaggtcgacggaaaaaggttaatacaacgtac                            |
| 1754   | ctcctggatccgtatagaaagtaacatgctcag                             |
| 1755   | aggaggaattcatctgcacaaatcagcgtac                               |
| 1756   | ctcctctcagtagtacaacaagttgcaagacatg                            |
| 1757   | aggagctcgagaaacggctgaacgacctca                                |
| 1758   | ctcctggatcctaggtatgggtgctgctcaa                               |
| 1855   | aggaggaattcattgccaattggtttcaattg                              |
| 1856   | ctcctctcaggtcctcttctaaatctgacgg                               |
| 1857   | aggagctcgagaatgtcatgaaggctgctcagc                             |
| 1858   | ctcctggatcctttcaaatgacaccgcacaat                              |
| 1759   | aggaggaattcctgtgctgtaaacattgat                                |
| 1760   | ctcctctcaggtgtttctgaaatctggaacta                              |
| 1770   | ctcctggatccattctgcaaaatcagctctcg                              |
| 1919   | aggagctcgagacagggcagacagctattgcc                              |
| 3069   | gttggggccttgaagtaaatgctagtaaggagaagaactttcact                 |
| 3070   | ccgaattagcttgcatcgggttattgtatagttcatccatgc                    |
| 3250   | acgactcactatagggcgaattg                                       |
| 3251   | ctcactaagggaacaaaagctgg                                       |
| 3252   | caggacttctcttgattaac                                          |
| 3253   | caattcgccctatagtgagctggaagctcttctaaatgcc                      |
| 3254   | ccagctttgtccctttagtgagctgttgaagtgagtgctacc                    |
| 3255   | gcaatgattgtgccaattatcg                                        |
| 3256   | cgatttctttccattgct                                            |
| 3257   | caattcgccctatagtgagctgtaaatgctccagcagcga                      |
| 3258   | ccagctttgtccctttagtgagagcagtgctgccgatcgg                      |
| 3259   | tgctgctactctcagcaaca                                          |
| 3860   | caattcgccctatagtgagctgtaaatggttgaacataattccac                 |
| 3861   | caattcgccctatagtgagctgtaggaccgatcggcataattg                   |
| 3866   | ttcacttacaatcgccgtttg                                         |
| 3867   | caattcgccctatagtgagctgtaagcttaattccatatcctttc                 |
| 3868   | ccagctttgtccctttagtgaggcaacaaaatgaggataaatc                   |
| 3869   | tgtaaggctgaaacgcttcg                                          |
| 3903   | ttgtgagcggataacaattttctataatggagacgatcaa                      |
| 3904   | ccgaattagcttgcatcgggtcgacgcggcatttcaaaaggccccaac              |
| TM858  | ggcagagaaccaacaatgaa                                          |
| TM859  | tccagagataccggctcttga                                         |
| TM860  | catccatgccatgtgtaatcccagc                                     |
| TM861  | ccattactctccacacaatctgcc                                      |
| TM883  | aggaaagcttcaaaaacaatacgtttgacgcagcaaaattatcaaggagcggggaagattg |
| TM884  | gcaatctcccgcctcctgaataaatttgctcgtcaaacgtattgtttgaaagctttct    |
| TM885  | gaggagagagggatctgaaatgagtaaaaggagaagaactttc                   |
| TM886  | gaaaagttctctcttactcattcaagatcccctctctcct                      |
| TM887  | ggcatggatgaaactatacaaacatcaccatcaccatcactaaccgcatgcaagctaattc |
| TM888  | gaattagctgcatcgggttagtgatggtgatggtgattgtatagttcatccatgccc     |
| TM1013 | gaggagagaggggatctgaaatggttgcacaaacgattc                       |
| TM1014 | gtgaaaagttctctcttactagcactcgcagccgcc                          |

**TABLE S3** Relative expression levels of GFP mRNA in the *B. subtilis*  $\Delta 7$  ancestral strain<sup>a</sup>

| Construct                                 | Fold difference in GFP mRNA levels ( $\pm$ SD <sup>b</sup> ) |
|-------------------------------------------|--------------------------------------------------------------|
| PhoD <sub>SP</sub> -GFP                   | 1.0                                                          |
| PhoD <sub>SP</sub> -GFP <sup>6*His</sup>  | 0.28 ( $\pm$ 0.07)                                           |
| PhoD <sub>SP</sub> -GFP, $\Delta$ tatCd   | 0.95 ( $\pm$ 0.19)                                           |
| PhoD <sub>SP</sub> -GFP, $\Delta$ tatCy   | 0.91 ( $\pm$ 0.13)                                           |
| PhoD <sub>SP</sub> -GFP, $\Delta$ tatCdCy | 0.97 ( $\pm$ 0.21)                                           |
| <sup>AA</sup> PhoD <sub>SP</sub> -GFP     | 0.67 ( $\pm$ 0.15)                                           |
| GFP                                       | 1.8 ( $\pm$ 0.12)                                            |

<sup>a</sup>Expression of PhoD<sub>SP</sub>-GFP was standardized to 1.0.

<sup>b</sup>Standard deviation

<sup>c</sup>GFP mRNA not detected

**TABLE S4** Mass spectrometry peptide identification of the top band of purified GFP<sup>6+His</sup>

| Peptide                        | Variable modifications     | m/z     | Da     | Score | Expect                |
|--------------------------------|----------------------------|---------|--------|-------|-----------------------|
| (F) EVNASKGEEL (F)             |                            | 538.70  | 0.43   | 18.9  | 2.30×10 <sup>-7</sup> |
| (F) EVNASKGEELF (T)            |                            | 1222.74 | 0.14   | 21.1  | 2.70×10 <sup>-6</sup> |
| (F) SVSGEGEGDATY (G)           |                            | 586.49  | 0.25   | 22.5  | 5.50×10 <sup>-8</sup> |
| (F) SVSGEGEGDATYGL (T)         |                            | 735.55  | 0.21   | 23.4  | 1.20×10 <sup>-8</sup> |
| (F) SVSGEGEGDATYGLTL (K)       |                            | 842.93  | 0.52   | 15.6  | 2.10×10 <sup>-6</sup> |
| (F) ARYPDHHMKQHDF (K)          | Oxidation at position 7    | 854.53  | 0.14   | 17.0  | 2.50×10 <sup>-7</sup> |
| (F) ARYPDHHMKQHDF (K)          |                            | 564.60  | 0.0036 | 15.1  | 2.20×10 <sup>-5</sup> |
| (F) FKSAMPEGYVQERTIF (F)       | Oxidation at position 5    | 640.38  | 0.063  | 23.9  | 5.40×10 <sup>-7</sup> |
| (F) FKSAMPEGY (V)              |                            | 515.49  | 0.25   | 19.5  | 1.10×10 <sup>-7</sup> |
| (F) KSAMPEGY (V)               | Oxidation at position 4    | 449.91  | 0.21   | 19.3  | 2.50×10 <sup>-7</sup> |
| (F) KSAMPEGYVQERTIF (F)        | Oxidation at position 4    | 886.69  | 0.25   | 18.2  | 1.90×10 <sup>-8</sup> |
| (F) KSAMPEGYVQERTIFF (K)       | Oxidation at position 4    | 640.44  | 0.12   | 21.8  | 2.70×10 <sup>-6</sup> |
| (F) KSAMPEGY (V)               |                            | 441.65  | -0.055 | 16.9  | 1.10×10 <sup>-7</sup> |
| (Y) VQERTIF (F)                |                            | 446.91  | 0.16   | 16.5  | 3.90×10 <sup>-5</sup> |
| (Y) VQERTIFF (K)               |                            | 1039.65 | 0.093  | 16.0  | 7.20×10 <sup>-5</sup> |
| (Y) VQERTIFFKDDGNY (K)         |                            | 866.74  | 0.32   | 19.2  | 1.00×10 <sup>-7</sup> |
| (F) FKDDGNY (K)                |                            | 429.92  | 0.23   | 15.2  | 1.80×10 <sup>-6</sup> |
| (Y) KTRAEVVKFEGDTL (V)         |                            | 747.64  | 0.24   | 22.9  | 2.30×10 <sup>-7</sup> |
| (F) EGDTLVNRIEL (K)            |                            | 629.66  | -0.18  | 16.4  | 8.10×10 <sup>-6</sup> |
| (F) KEDGNILGHKL (E)            |                            | 612.47  | 0.13   | 16.3  | 1.40×10 <sup>-6</sup> |
| (F) KEDGNILGHKLEY (N)          |                            | 506.26  | 0.33   | 24.7  | 5.90×10 <sup>-7</sup> |
| (F) KEDGNILGHKLEYNYSNHN (I)    |                            | 627.39  | -0.16  | 15.7  | 4.50×10 <sup>-4</sup> |
| (L) GHKLEYNYSNHN (I)           |                            | 869.67  | 0.27   | 15.9  | 4.90×10 <sup>-7</sup> |
| (L) EYNYSNHN (I)               |                            | 651.97  | 0.20   | 17.0  | 3.30×10 <sup>-6</sup> |
| (Y) NYSNHN (I)                 |                            | 505.96  | 0.24   | 15.8  | 8.30×10 <sup>-7</sup> |
| (Y) IMADKQKNGIKVNF (K)         | Oxidation at position 2    | 541.41  | 0.11   | 25.8  | 1.20×10 <sup>-7</sup> |
| (Y) IMADKQKNGIKVNF (K)         |                            | 803.65  | 0.21   | 22.5  | 9.80×10 <sup>-8</sup> |
| (F) KIRHNIEDGSVQL (A)          |                            | 755.19  | 0.28   | 20.4  | 5.50×10 <sup>-7</sup> |
| (F) KIRHNIEDGSVQLADHY (Q)      |                            | 666.01  | 0.34   | 29.9  | 6.50×10 <sup>-8</sup> |
| (L) ADHYQQNTPIGDGPVLLPDNHY (L) |                            | 822.37  | 0.31   | 24.6  | 1.20×10 <sup>-6</sup> |
| (Y) QQNTPIGDGPVLLPDNHY (L)     | Gln→pyro-Glu at position 1 | 981.23  | 0.26   | 21.4  | 1.40×10 <sup>-8</sup> |
| (Y) QQNTPIGDGPVLLPDNHY (L)     |                            | 989.27  | -0.22  | 19.0  | 1.60×10 <sup>-7</sup> |



**TABLE S5** Mass spectrometry peptide identification of the bottom band of purified GFP<sup>6\*His</sup>

| Peptide                                   | Variable modifications     | m/z     | Da    | Score | Expect                 |
|-------------------------------------------|----------------------------|---------|-------|-------|------------------------|
| (F)SVSGEGEGDATY (G)                       |                            | 586.44  | 0.20  | 22.1  | 8.80×10 <sup>-8</sup>  |
| (F)SVSGEGEGDATYGKL (T)                    |                            | 735.57  | 0.23  | 25.8  | 5.60×10 <sup>-10</sup> |
| (F)ARYPDHMKQHDF (K)                       |                            | 564.96  | 0.36  | 15.5  | 1.80×10 <sup>-5</sup>  |
| (F)KSAMPEGY (V)                           | Oxidation at position 4    | 898.46  | 0.063 | 17.4  | 4.60×10 <sup>-8</sup>  |
| (F)KSAMPEGYVQERTIF (F)                    | Oxidation at position 4    | 591.51  | 0.22  | 23.0  | 7.90×10 <sup>-7</sup>  |
| (F)KSAMPEGYVQERTIF (F)                    |                            | 586.35  | 0.39  | 23.5  | 2.10×10 <sup>-7</sup>  |
| (F)KSAMPEGYVQERTIFF (K)                   |                            | 635.37  | 0.38  | 19.1  | 1.30×10 <sup>-5</sup>  |
| (Y)VQERTIFFKDDGNY (K)                     |                            | 866.61  | 0.19  | 18.0  | 5.40×10 <sup>-7</sup>  |
| (F)FKDDGNY (K)                            |                            | 429.94  | 0.25  | 15.2  | 4.30×10 <sup>-7</sup>  |
| (F)EGDTLVNRIEL (K)                        |                            | 1258.72 | 0.056 | 17.6  | 1.50×10 <sup>-5</sup>  |
| (F)KEDGNILGHKLEY (N)                      |                            | 506.34  | 0.41  | 22.9  | 7.20×10 <sup>-7</sup>  |
| (F)KEDGNILGHKLEYNYNSHNVY (I)              |                            | 836.71  | 0.31  | 27.4  | 2.20×10 <sup>-8</sup>  |
| (Y)NYNSHNVY (I)                           |                            | 505.94  | 0.22  | 15.1  | 1.20×10 <sup>-6</sup>  |
| (Y)IMADKQKNGIKVNF (K)                     | Oxidation at position 2    | 541.64  | 0.34  | 18.3  | 2.90×10 <sup>-5</sup>  |
| (Y)IMADKQKNGIKVNF (K)                     |                            | 803.74  | 0.30  | 21.0  | 2.50×10 <sup>-7</sup>  |
| (F)KIRHNIEDGSQLADHY (Q)                   |                            | 666.12  | 0.45  | 31.3  | 2.20×10 <sup>-8</sup>  |
| (F)KIRHNIEDGSQLADHYQQNTPIGDGPVLLPDNHY (L) |                            | 989.79  | 0.55  | 18.1  | 1.80×10 <sup>-5</sup>  |
| (L)ADHYQQNTPIGDGPVLLPDNHY (L)             |                            | 822.52  | 0.46  | 23.6  | 1.10×10 <sup>-6</sup>  |
| (L)ADHYQQNTPIGDGPVLLPDNHYLSTQSAL (S)      |                            | 1055.73 | 0.22  | 16.0  | 5.60×10 <sup>-6</sup>  |
| (Y)QQNTPIGDGPVLLPDNHY (L)                 | Gln→pyro-Glu at position 1 | 981.18  | 0.21  | 24.9  | 5.00×10 <sup>-9</sup>  |
| (Y)QQNTPIGDGPVLLPDNHY (L)                 |                            | 989.62  | 0.13  | 17.7  | 5.50×10 <sup>-7</sup>  |
| (Y)QQNTPIGDGPVLLPDNHYL (S)                |                            | 697.77  | 0.082 | 17.2  | 5.90×10 <sup>-5</sup>  |
| (Y)QQNTPIGDGPVLLPDNHYLSTQSAL (S)          |                            | 893.78  | 0.33  | 18.7  | 3.10×10 <sup>-6</sup>  |
